# Supplementary material for: Deceased Kidney Donor Biomarkers: Relationship between Delayed Kidney Function and Graft Function Three Years after Transplantation
Source: MDPI journal article supplement (doi:10.3390/diagnostics14070717), 2024-03-28
Supplement: s1 [file s1]

**Table S1.** Baseline characteristics of donors

| <b>Clinicals Characteristics</b>        | <b>n=43</b>               |
|-----------------------------------------|---------------------------|
| Age, years                              | 53.51 (13.33)             |
| Female n (%) / Male n (%)               | 18 (41.9) / 25 (58.1)     |
| Body mass index, kg/m <sup>2</sup>      | 25.87 (3.62)              |
| Cause of death                          |                           |
| Head trauma, n (%)                      | 6 (14)                    |
| Cerebral vascular accident, n (%)       | 31 (72.1)                 |
| Other, n (%)                            | 6 (14)                    |
| Terminal serum creatinine, $\mu$ mol/l  | 95.13 (39.35)             |
| KDRI                                    | 1.1686 (0.358)            |
| KDPI, (%)                               | 59.14 (26.57)             |
| KDPI >85 %                              | 8 (18.5%)                 |
| Diuresis ml/24 h                        | 3330 (2400-4000)          |
| Expanded criteria donors, n (%)         | 23 (53.5)                 |
| Donation after circulatory death, n (%) | 1 (2.3)                   |
| History of hypertension n (%)           | 25 (58.1)                 |
| Use of any inotrope, n (%)              | 34 (79.1)                 |
| Serum NGAL pg/ml                        | 28535.0 (13713.0-54908.4) |

|                       |                        |
|-----------------------|------------------------|
| Serum IL-18 pg/ml     | 168.93 (126.8-303.2)   |
| Serum KIM-1 pg/ml     | 236.4 (160.9-389.3)    |
| Serum CXCL10 pg/ml    | 41.9 (29.0-108.2)      |
| Urinary NGAL pg/ml    | 1299.0 (1041.5-5321.2) |
| Urinary IL-18 pg/ml   | 12.4 (4.7-17.6)        |
| Urinary KIM-1, ng/ml  | 2.4 (0.9-4.4)          |
| Urinary CXCL10, ng/ml | 29.8 (19.6-52.5)       |

Results are presented as mean  $\pm$  SD or n (%), quantitative variables are presented as medians (interquartile ranges).

CXCL10 - C-X-C motif chemokine 10, IL-18 - interleukin-18, KDPI - Kidney Donor Profile Index; KDRI - Kidney Donor Risk Index, KIM-1 - kidney injury molecule-1, NGAL-neutrophil gelatinase-associated lipocalin.

**Table S2.** Characteristics of recipient outcomes, stratified by delayed graft function

|                                                    | <b>Total</b>                    | <b>IGF</b>                      | <b>DGF</b>                    | <b>P value</b>   |
|----------------------------------------------------|---------------------------------|---------------------------------|-------------------------------|------------------|
| eGFR at 1 month, ml/min/1,73m <sup>2</sup>         | 39.70 (15.68)<br>41 (6.4-72)    | 44.62 (14.3)<br>45.5 (14-72)    | 27.28 (11.7)<br>27.4 (6.4-47) | <b>&lt;0.001</b> |
| eGFR at 3 months, ml/min/1,73m <sup>2</sup>        | 43.85 (16.47)<br>43.5 (12.7-89) | 44.6 (16.2)<br>46.8 (21-89)     | 36.4 (15.2)<br>37 (12.7-58)   | <b>0.022</b>     |
| eGFR at 6 months, ml/min/1,73m <sup>2</sup>        | 47.69 (21.94)<br>47 (3-101)     | 51.4 (22.2)<br>50 (3-101)       | 37.8 (18.4)<br>37 (10-68)     | <b>0.024</b>     |
| eGFR 12 months, ml/min/1,73m <sup>2</sup>          | 52.1 (19.12)<br>47.5 (11-99)    | 55.3 (18.2)<br>51 (23.8-99)     | 41.7 (18.9)<br>39 (11-72)     | <b>0.024</b>     |
| eGFR 24 months, ml/min/1,73m <sup>2</sup>          | 53.38 (19.67)<br>50 (17-102)    | 55.6 (19.8)<br>50 (17-102)      | 45.3 (17.7)<br>44.7 (18-67)   | 0.146            |
| eGFR 36 months, ml/min/1,73m <sup>2</sup>          | 55.50 (19.59)<br>54 (20-112.5)  | 58.4 (18.9)<br>55.45 (29-119.5) | 45.1 (19.2)<br>43.2 (20-81.2) | <b>0.038</b>     |
| Acute rejection during 1 <sup>st</sup> year, n (%) | 8 (10.5)                        | 3 (5.5)                         | 5 (23.8)                      | <b>0.033</b>     |

*eGFR- estimated glomerular filtration rate, IGF - immediate graft function; DGF- delayed graft function.*

Values reported are presented as means (SD) and as medians (min.-max.) or n (%).

*Kruskal-Wallis tests*
